# Supplementary material for: The Emotional Impact of COVID-19 News Reporting: A Longitudinal Study Using Natural Language Processing
Source: Hindawi journal article supplement (doi:10.1155/2023/7283166), 2023-03-09
Supplement: f1 [file 7283166.f1.zip]

Archive with 2 entries (2 files):
- Supp tables_Revised.docx
- Supplementary Descriptions.docx
