# Supplementary material for: The Emotional Impact of COVID-19 News Reporting: A Longitudinal Study Using Natural Language Processing
Source: Hindawi journal article supplement (doi:10.1155/2023/7283166), 2023-03-09
Supplement: f1 [file 7283166.f1.zip › Supp tables_Revised.docx]

Supplementary Table 1: Average emotion scores by news channel

| News organisation | Anger | Joy | Optimism | Sadness |
| --- | --- | --- | --- | --- |
| BBC Breakfast | .119 | .193 | .271 | .417 |
| BBC Breaking News | .173 | .099 | .174 | .554 |
| BBC News (UK) | .191 | .113 | .195 | .501 |
| BBC News (World) | .221 | .100 | .162 | .516 |
| BBC News NI | .152 | .110 | .204 | .533 |
| BBC Newsnight | .155 | .066 | .287 | .493 |
| BBC Radio 4 | .112 | .312 | .260 | .316 |
| BBC Radio 4 Today | .149 | .113 | .376 | .362 |
| BBC Radio 5 Live | .120 | .208 | .260 | .412 |
| BBC Scotland News | .162 | .135 | .204 | .499 |
| Channel 4 News | .198 | .066 | .246 | .491 |
| Daily Express | .313 | .102 | .123 | .462 |
| Daily Mail Online | .250 | .099 | .144 | .508 |
| Metro | .206 | .102 | .171 | .522 |
| The Guardian | .226 | .091 | .182 | .501 |
| The Independent | .277 | .092 | .170 | .460 |
| The Mirror | .232 | .095 | .116 | .556 |
| The Sun | .253 | .126 | .151 | .470 |
| The Telegraph | .200 | .119 | .244 | .436 |

*Note:* Average emotion scores of news tweets across the entire period, by news channel. Scores are emotion levels coded by NLP model and range from 0 to 1.
